# Supplementary material
Source: PubMed Central journal article supplement (PMC6699853)
Supplement: supp_RA119.008666_144606_1_supp_351514_ptfzsk.pdf [file supp_RA119.008666_144606_1_supp_351514_ptfzsk.pdf]

## SUPPORTING INFORMATION

### **Benzoquinone, a leukemogenic metabolite of benzene, catalytically inhibits the tyrosine phosphatase PTPN2 and alters STAT1 signaling**

Romain Duval<sup>1,#</sup>, Linh-Chi Bui<sup>1</sup>, Cécile Mathieu<sup>1,§</sup>, Qing Nian<sup>1</sup>, Jérémy Berthelet<sup>1</sup>, Ximing Xu<sup>2</sup>, Iman Haddad<sup>3</sup>, Joelle Vinh<sup>3</sup>, Jean-Marie Dupret<sup>1</sup>, Florent Busi<sup>1</sup>, Fabien Guidez<sup>4</sup>, Christine Chomienne<sup>4,5</sup> and Fernando Rodrigues-Lima<sup>1,\*</sup>

#### CONTENTS

**Figure S1. Effects of 1,4-benzoquinone (BQ) on PTPN2 in the presence of reduced glutathione (GSH)**

**Figure S2. Dose-dependent inhibition of PTPN2 in Jurkat cells exposed to 1,4-benzoquinone (BQ)**

**Table S1. qPCR Primers used in gene expression analysis**

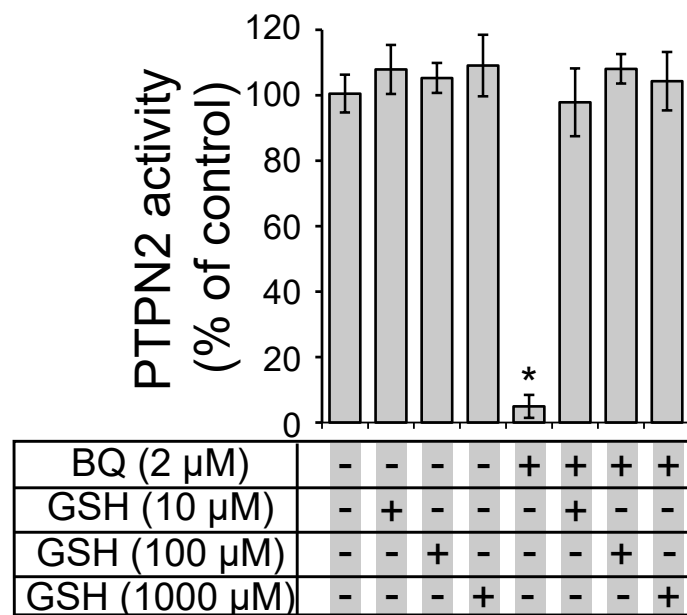

**Figure S1. Effects of 1,4-benzoquinone (BQ) on PTPN2 in the presence of reduced glutathione (GSH)**

Human PTPN2 (0.5  $\mu$ M) was incubated with BQ (2 mM) in presence of different concentrations of GSH for 20 min at 37 °C. Residual PTPN2 activity was measured using pNPP assay. Error bars indicate S.D. values. \*p<0.05 compared with controls.

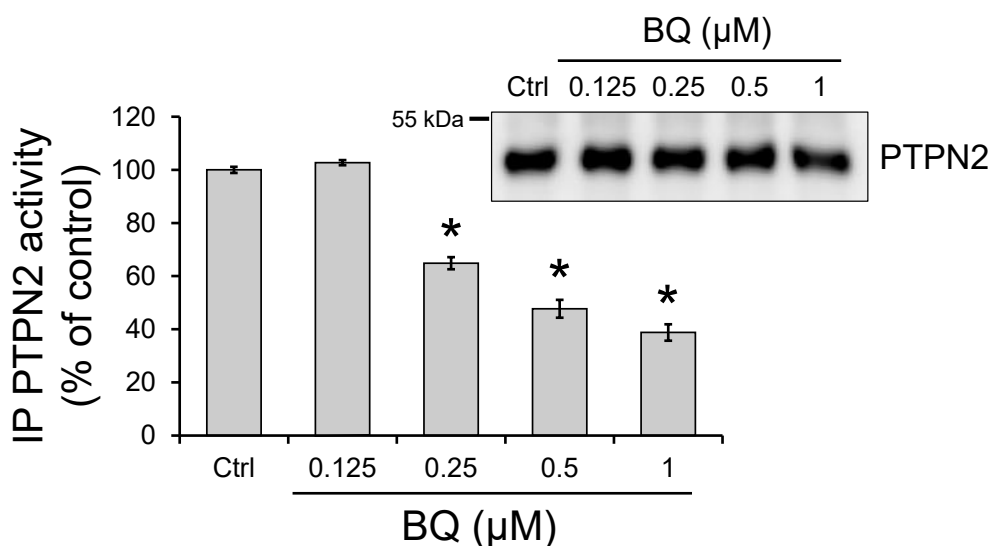

**Figure S2. Dose-dependent inhibition of PTPN2 in Jurkat cells exposed to 1,4-benzoquinone (BQ)**

Jurkat cells ( $5 \cdot 10^6$ ) were treated with DMSO (Ctrl) or 1,4-benzoquinone (BQ) for 30 min in PBS. Cells were washed and endogenous PTPN2 activity was assessed by immunoprecipitation of PTPN2 followed by RP-UFLC analysis. Error bars indicate means  $\pm$  S.D. \* $p < 0.05$  compared with control (Ctrl). Immunobeads were separated and analysed by western blot using anti-PTPN2 antibody (INSET).

**Supplementary Table 1: qPCR Primers used in gene expression analysis**

| Gene         | Accession No. | Primer sequences (5' → 3')                         | Product size (bp) |
|--------------|---------------|----------------------------------------------------|-------------------|
| <i>IRF1</i>  | NM_002198.2   | CAACAGATGAGGATGAGGAAGGGAA<br>CCATAGACAGAGGTGGGCTGG | 139               |
| <i>GBP1</i>  | NM_002053.2   | ACAGGGTCCAGTTGCTGAAAGA<br>TTGGTTAGGGGTGACAGGAAGG   | 198               |
| <i>APOL1</i> | NM_003661.3   | GCTGCTGCTGAACTGCCC<br>TCTGTACTGCTGGCCTTTATCGT      | 117               |
| <i>RPL19</i> | NM_000981.3   | GGCTCGCCTCTAGTGCCTC<br>CAAGGTGTTTTCCGGCATC         | 179               |
